# Supplementary material
Source: PubMed Central journal article supplement (PMC7339825)

# Supplementary Figure 1. Uncropped gels

Figure 1c

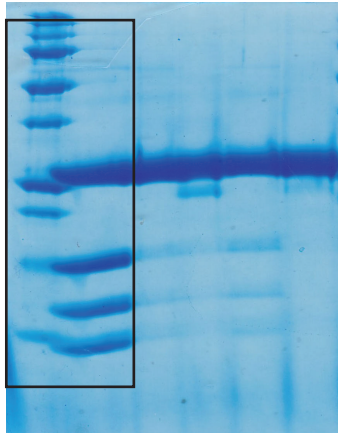

Figure 2d

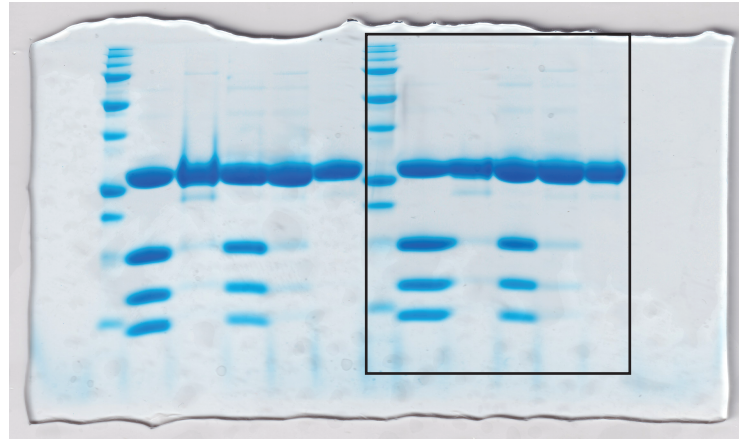

Figure 2f

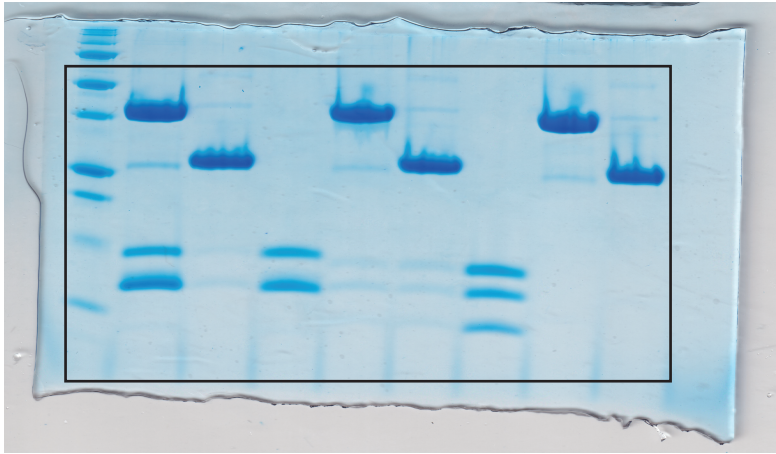

Figure 4a

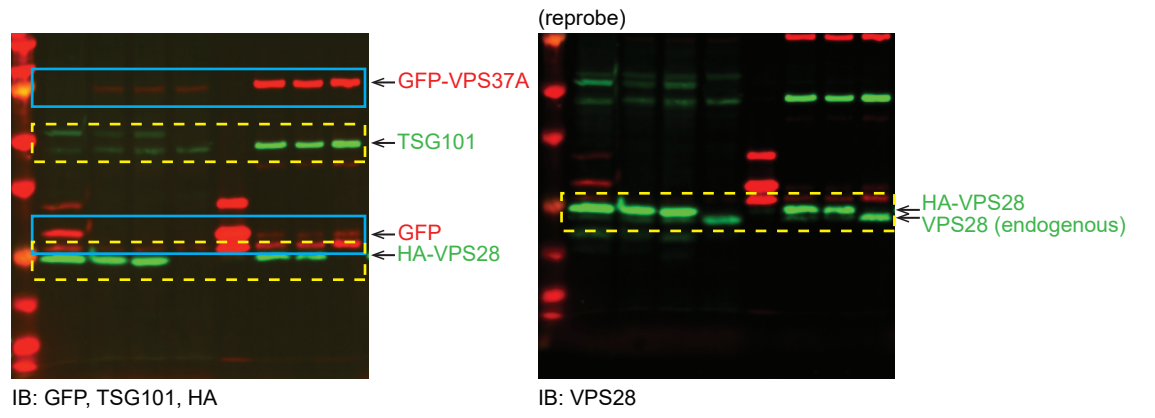

Figure 4e

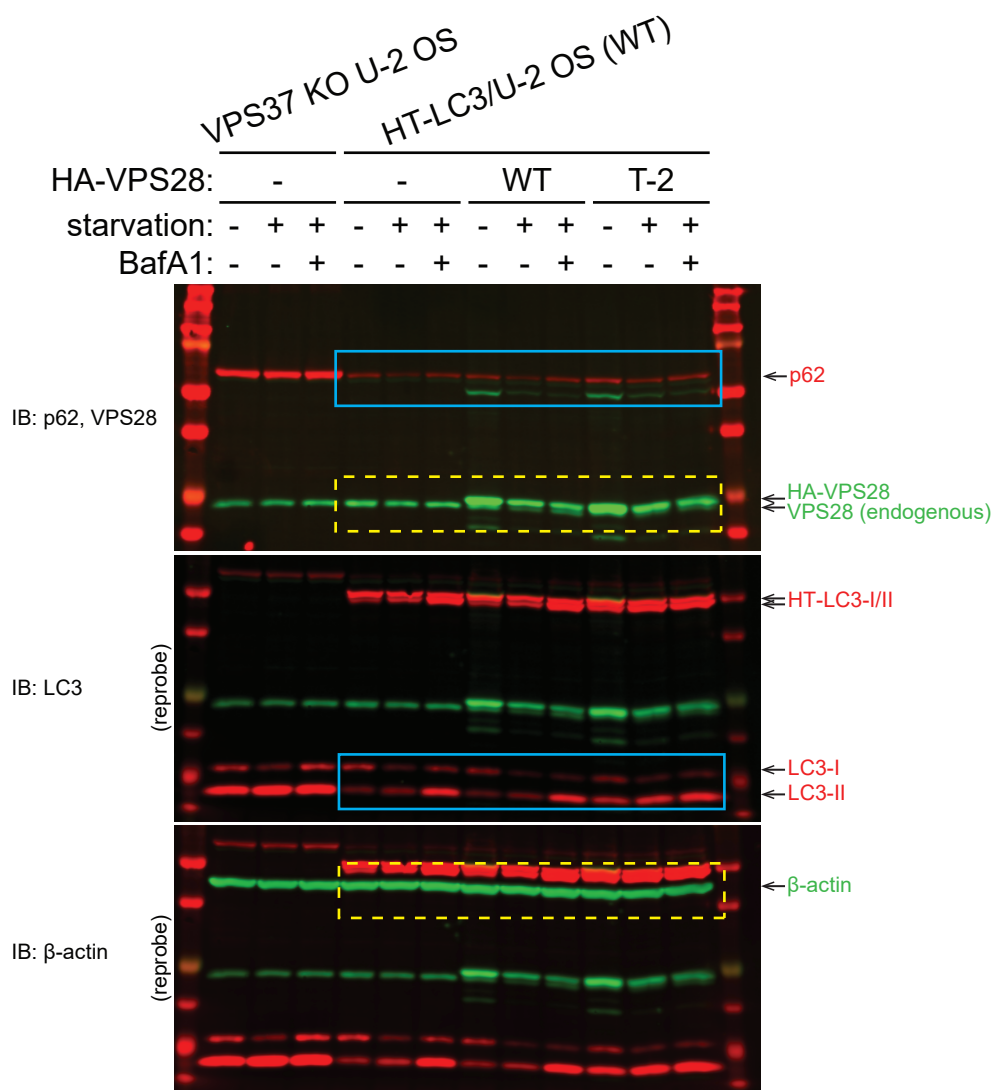

Figure 5 Cells anti nucleocapsid

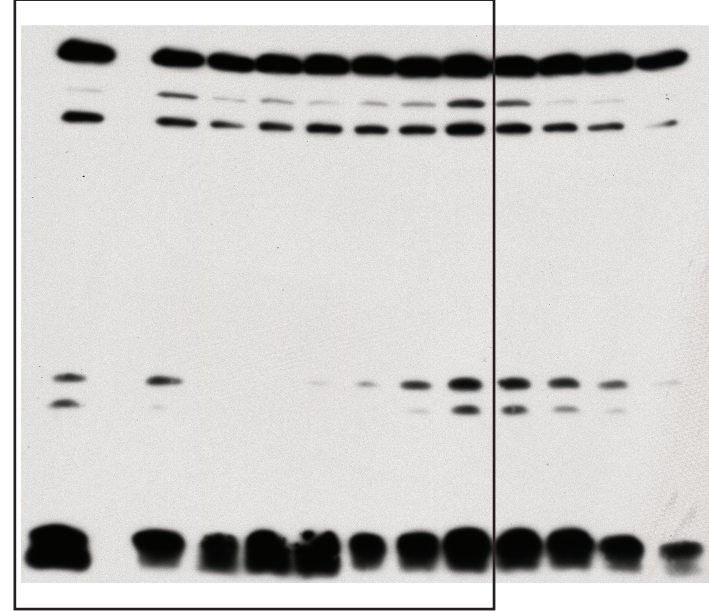

Figure 5 Cells anti tubulin

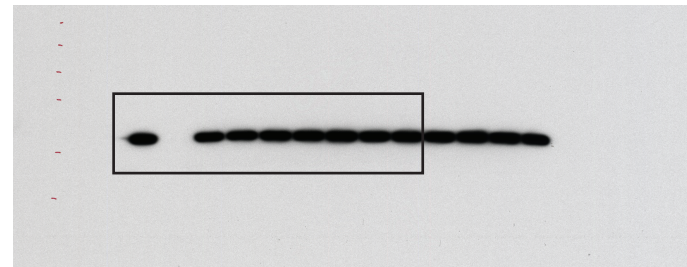

Figure 5 Cells anti VPS28

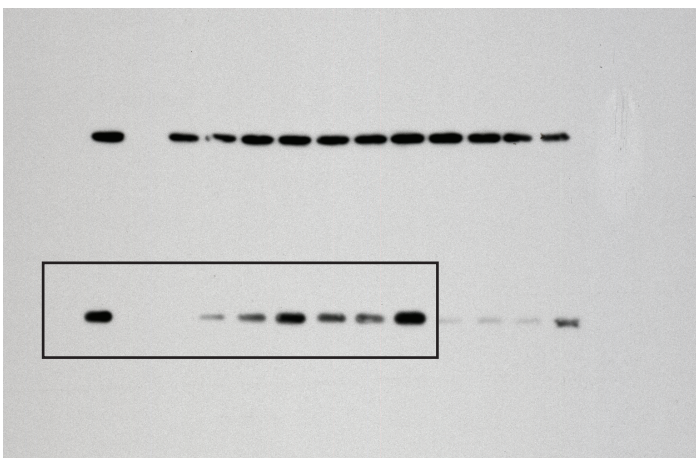

Figure 5 cells anti capsid

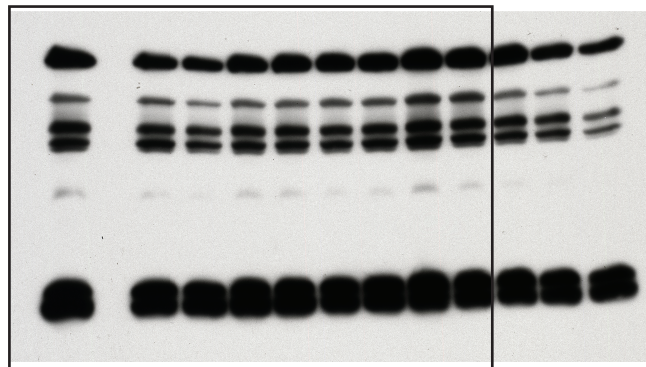

Figure 5 Virions anti capsid

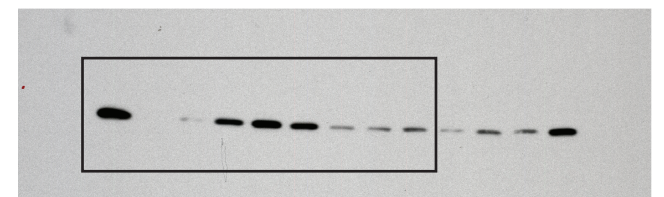

Figure 5 Virions anti nucleocapsid

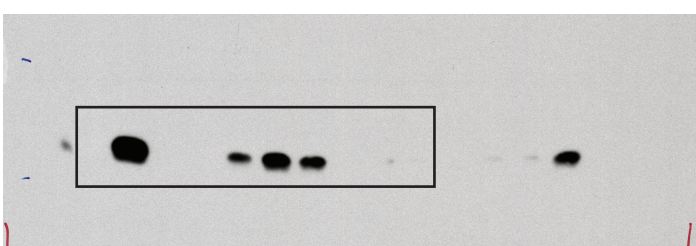

Figure S1

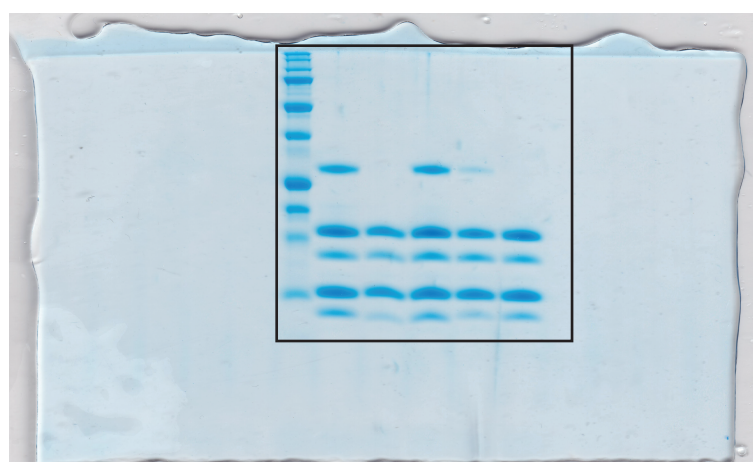

Supplement: NIHMS1581037-supplement-5.pdf [file NIHMS1581037-supplement-5.pdf]
